# Supplementary material
Source: MDPI journal article supplement (https://www.mdpi.com/2076-3417/14/8/3453)

Supplementary material:

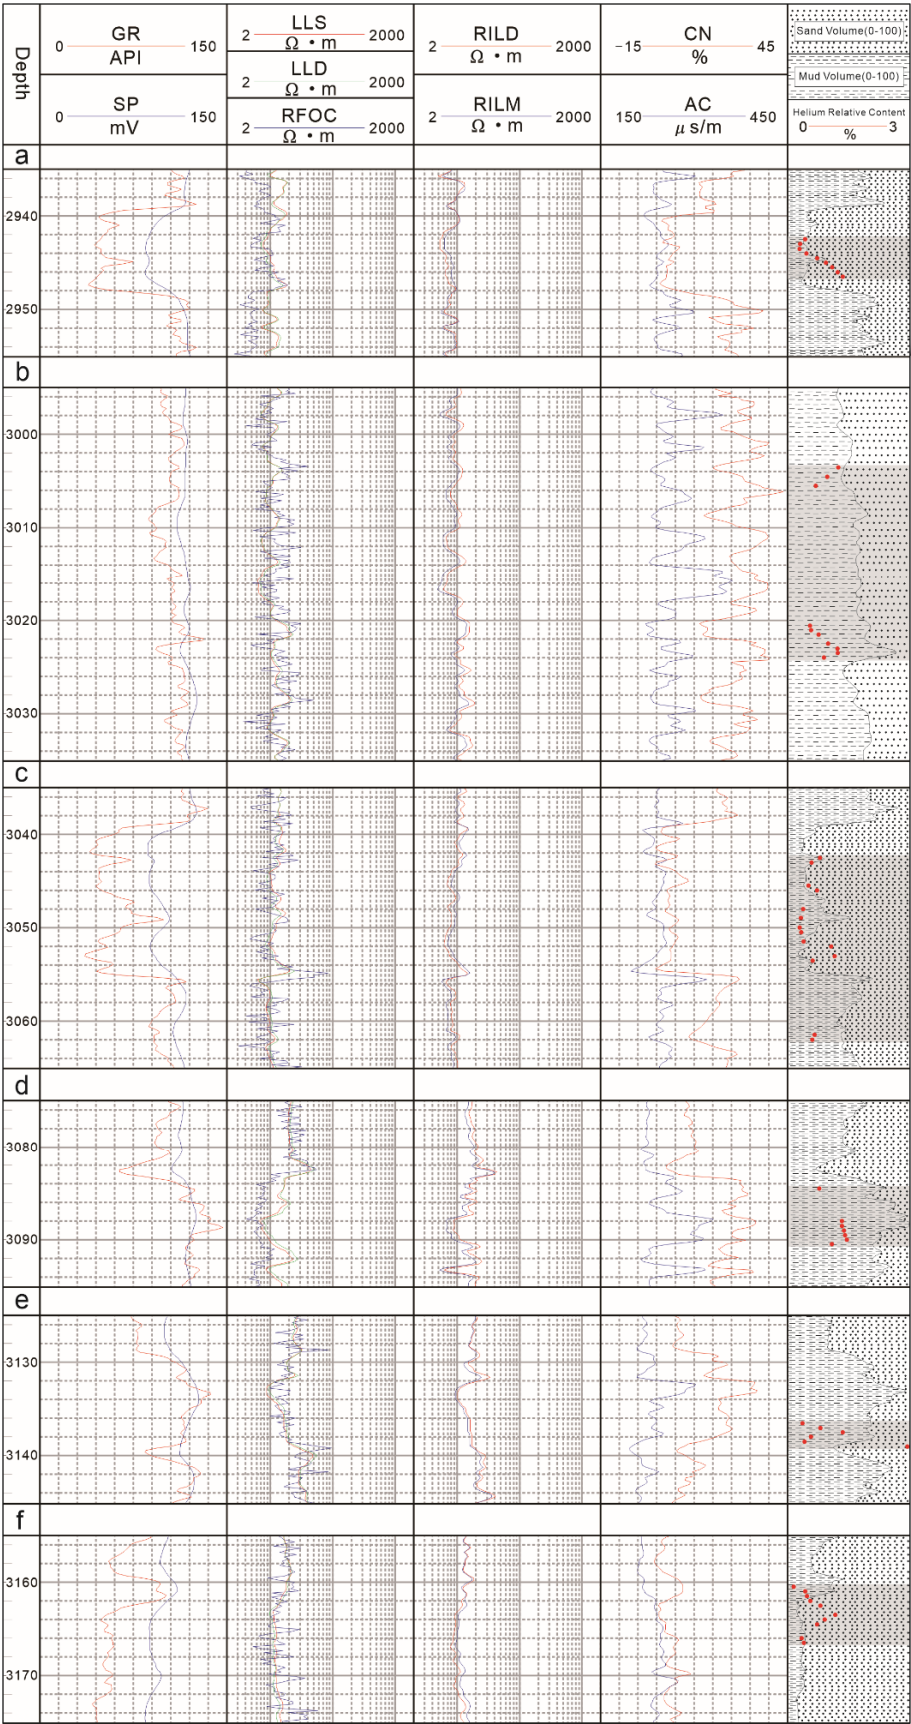

Figure S1. Analysis diagram of high helium concentration layers.

Supplement: s1 [file s1]
